# Supplementary figures and images for: Synthetic lethality between the cohesin subunits STAG1 and STAG2 in diverse cancer contexts
Source: eLife journal article supplement (doi:10.7554/elife.26980), 2017-07-10

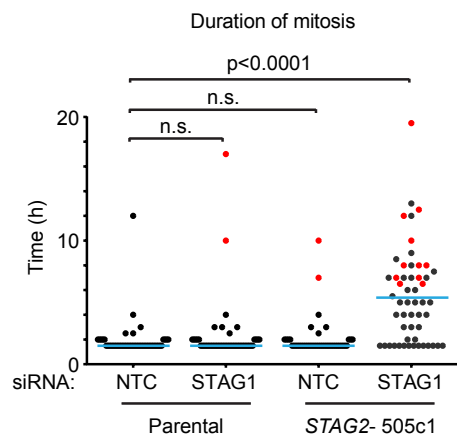

Supplement: supp [file elife-26980-supp-v1.zip]

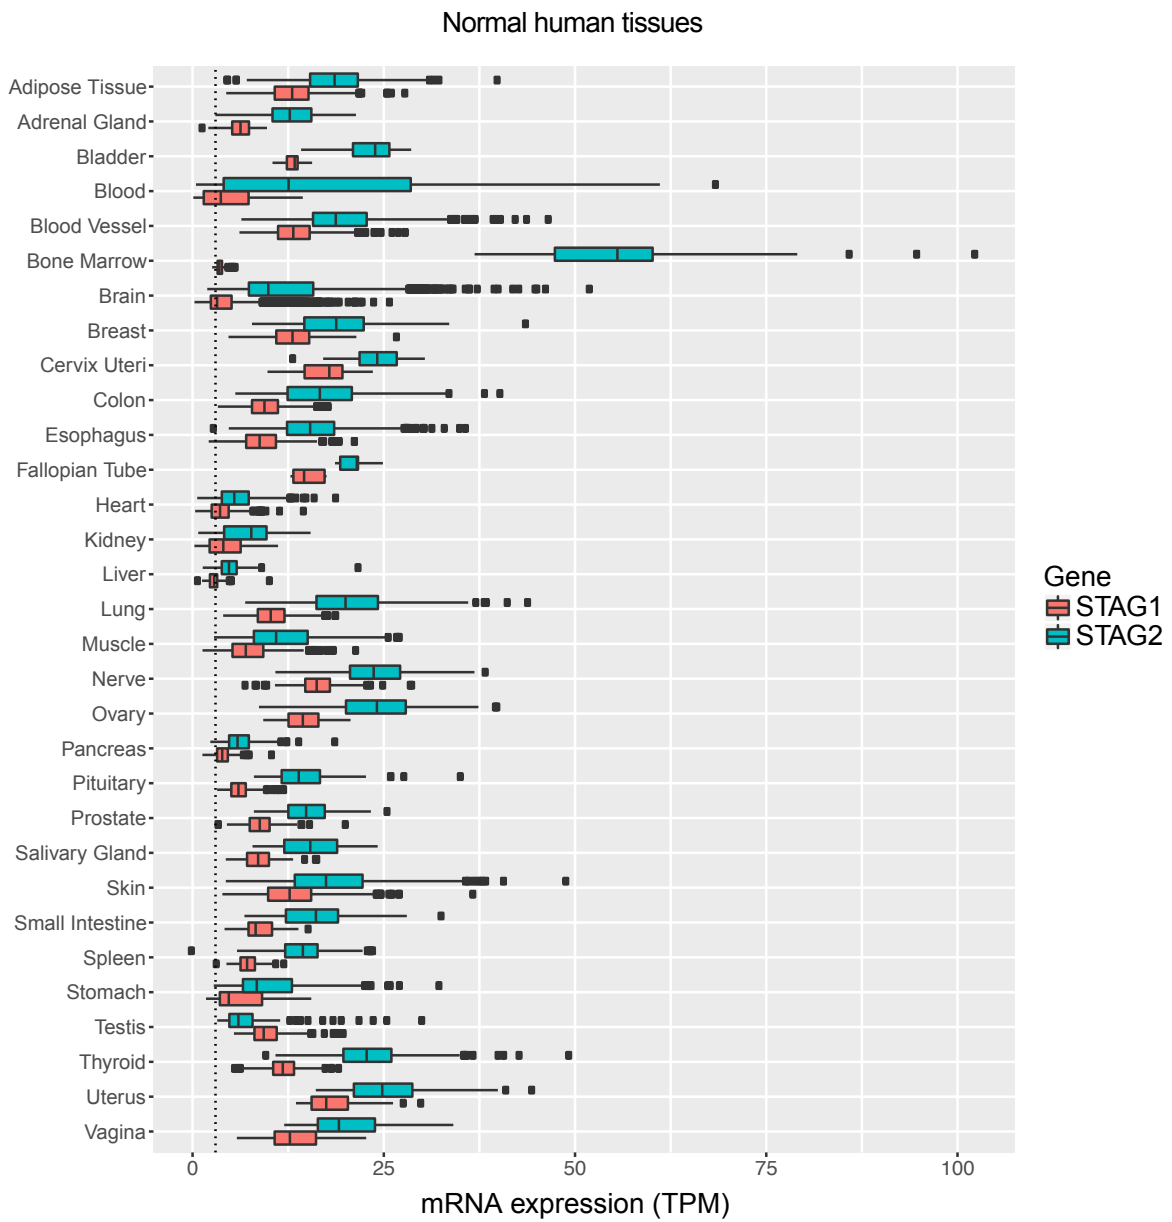

Supplement: supp [file elife-26980-supp-v1.zip]

**A**

**Cancer cell lines**

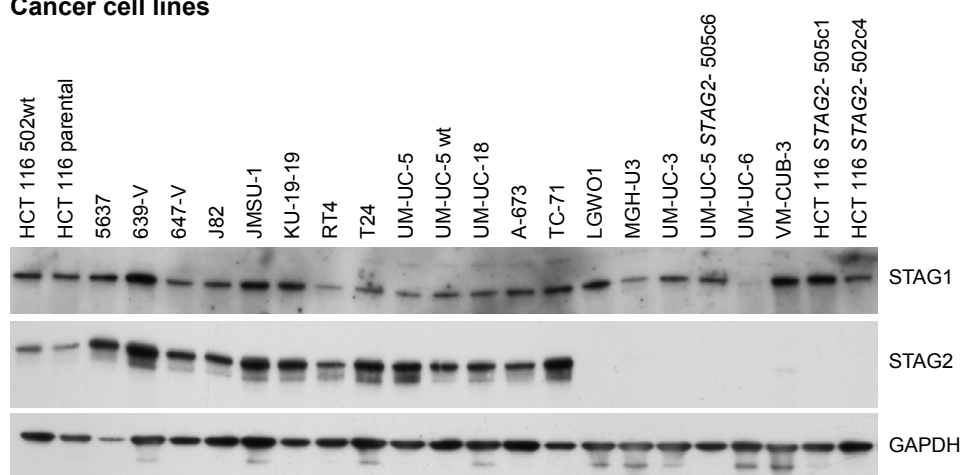

**B**

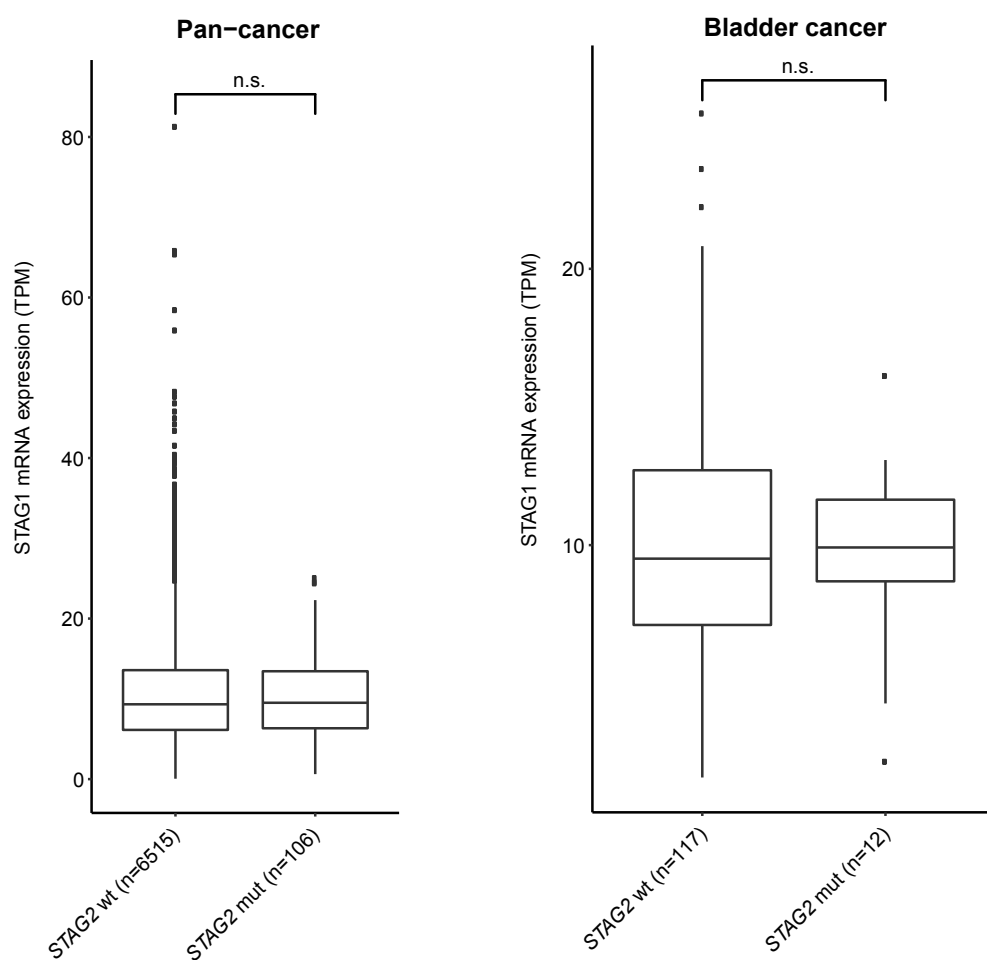

Supplement: supp [file elife-26980-supp-v1.zip]

# **A Restoration of STAG2 expression**

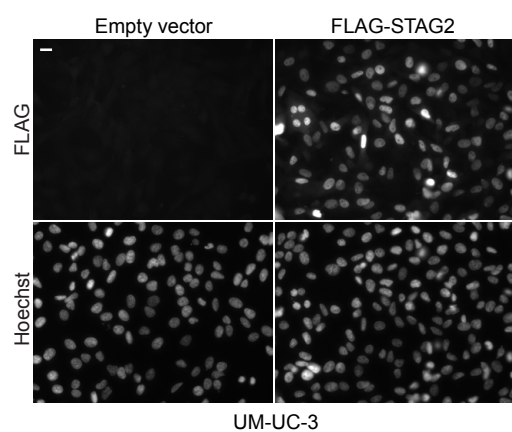

# **B**

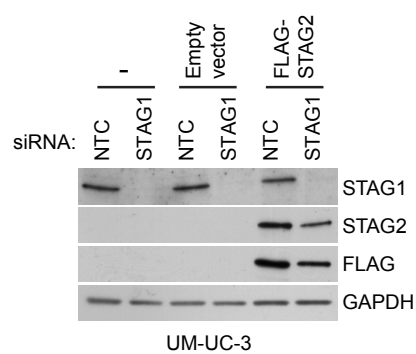

# **C**

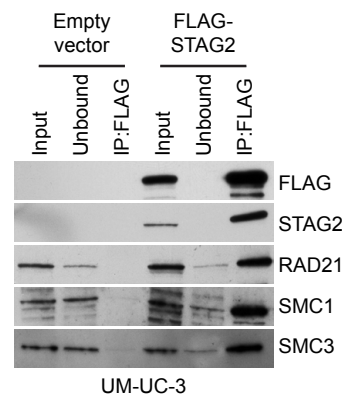

Supplement: supp [file elife-26980-supp-v1.zip]

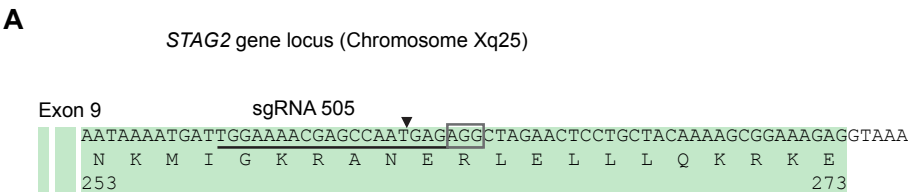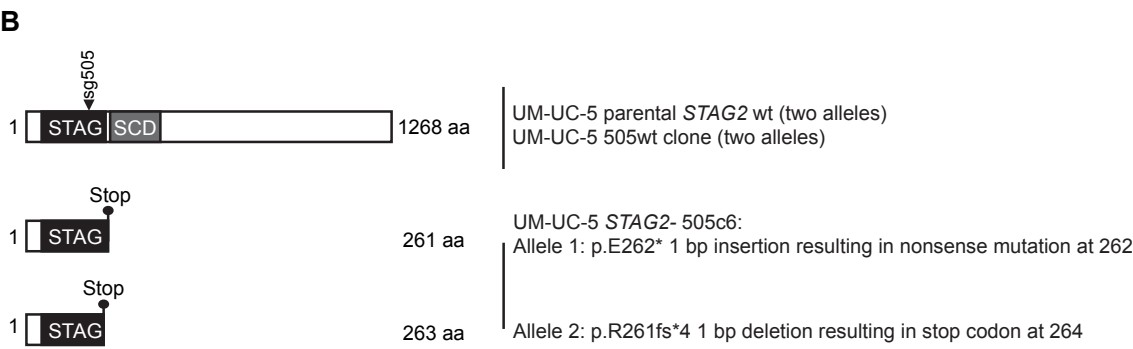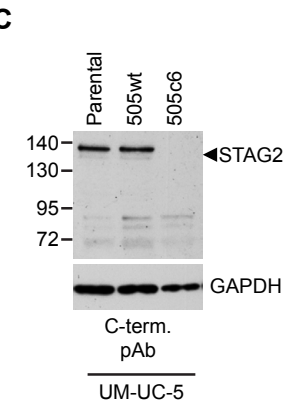

Supplement: supp [file elife-26980-supp-v1.zip]

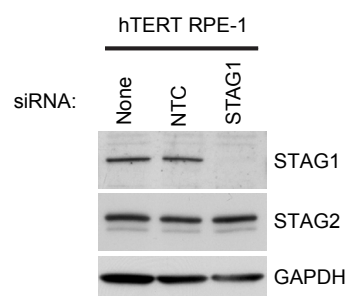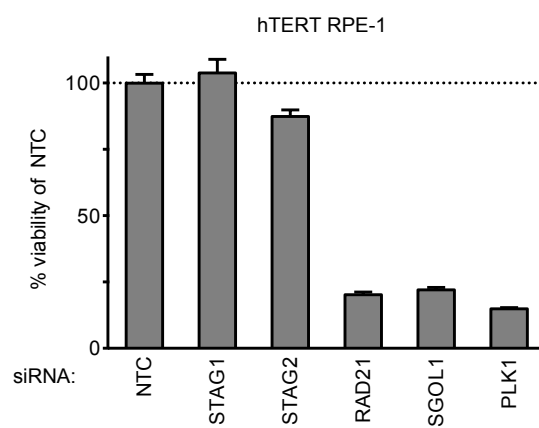

Supplement: supp [file elife-26980-supp-v1.zip]

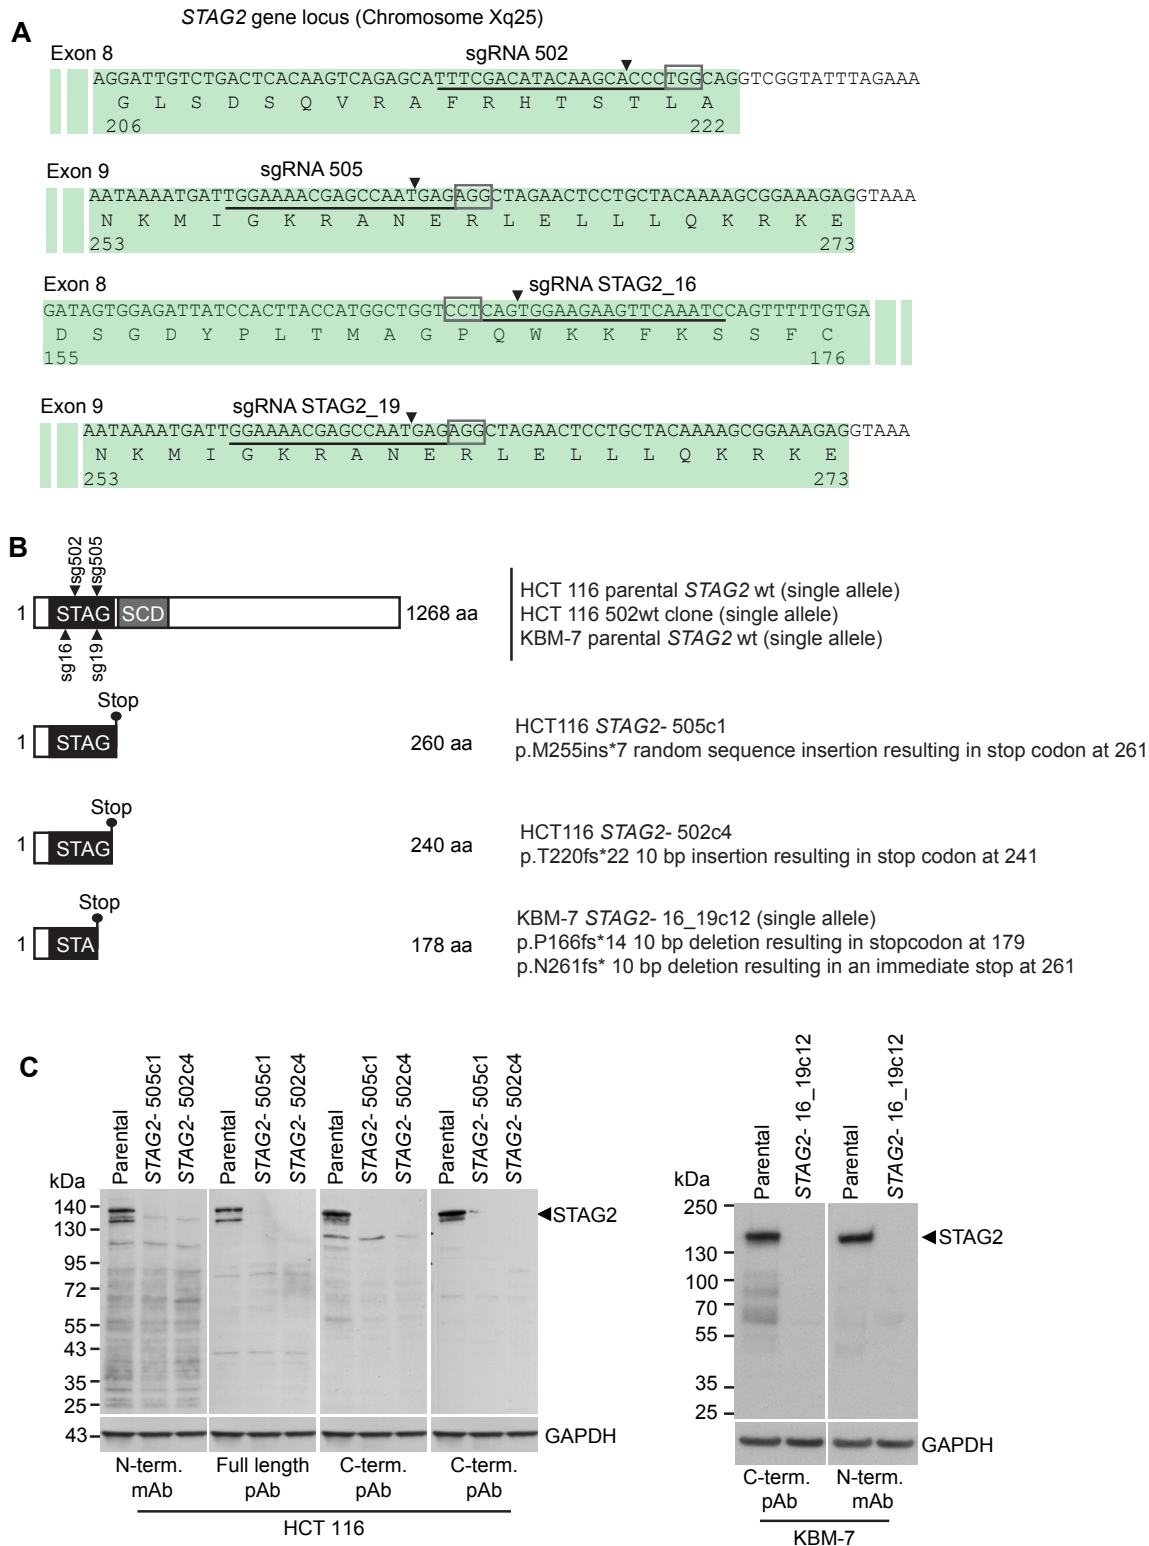

Supplement: supp [file elife-26980-supp-v1.zip]

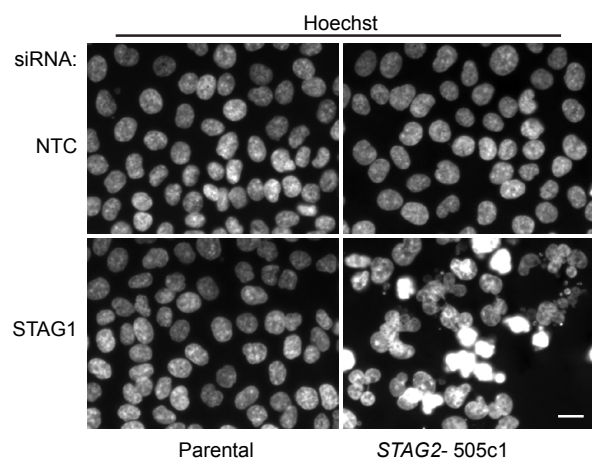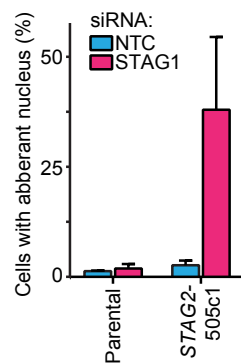

Supplement: supp [file elife-26980-supp-v1.zip]

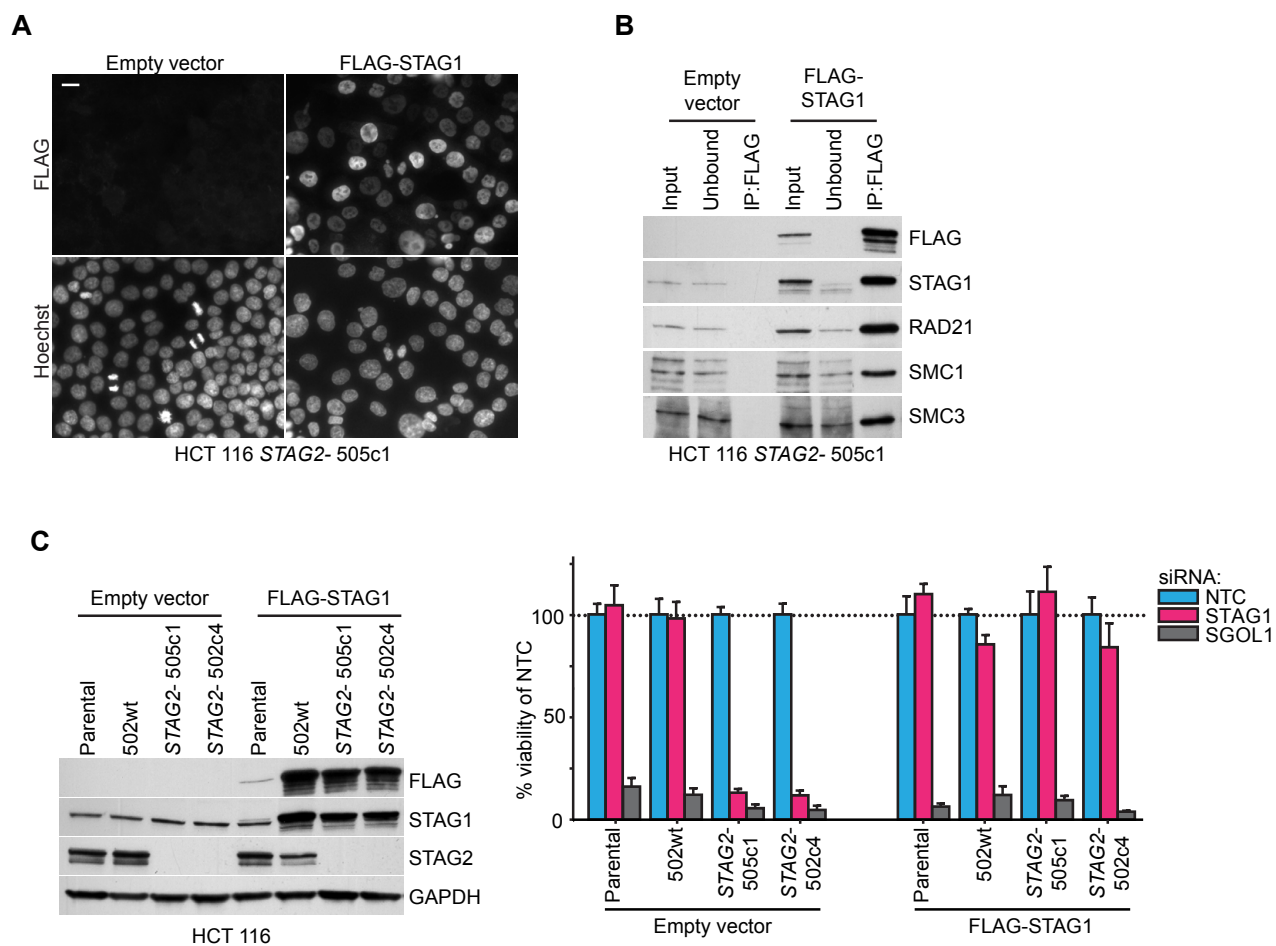

Supplement: supp [file elife-26980-supp-v1.zip]

A HCT 116 STAG2 cancer mutations

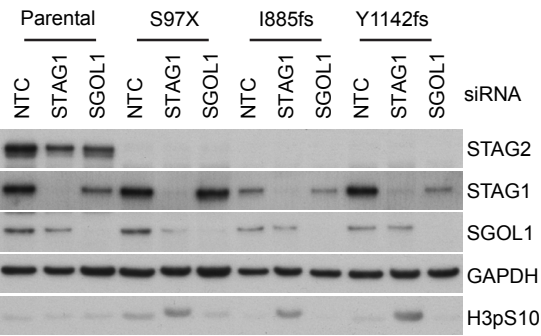

B

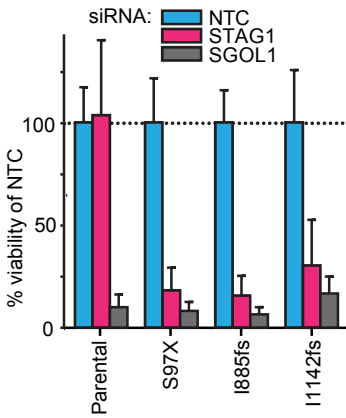

C

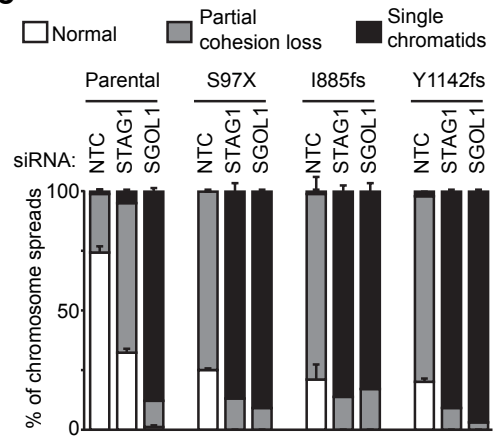

Supplement: supp [file elife-26980-supp-v1.zip]

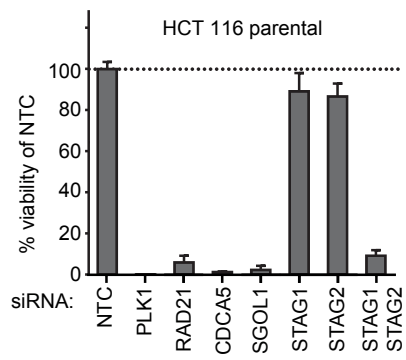

Supplement: supp [file elife-26980-supp-v1.zip]

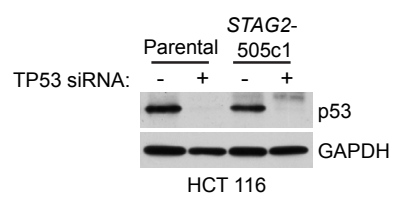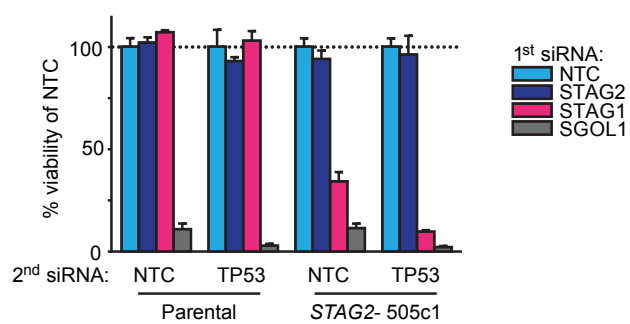

Supplement: supp [file elife-26980-supp-v1.zip]
